# Supplementary figures and images for: [Retracted] circZC3HAV1 Regulates TBC1D9 to Affect the Biological Behavior of Colorectal Cancer Cells
Source: Hindawi journal article supplement (doi:10.1155/2022/7386946), 2022-01-01

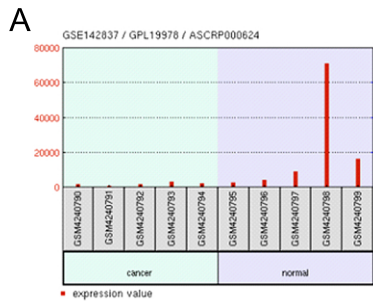

hsa\_circ\_0012634

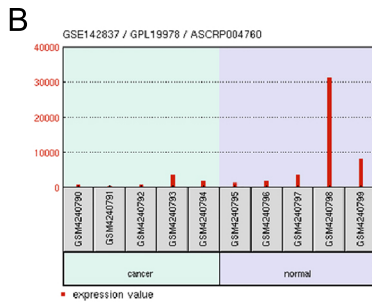

hsa\_circ\_0082628

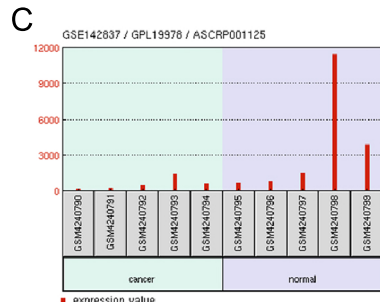

hsa\_circ\_0020934

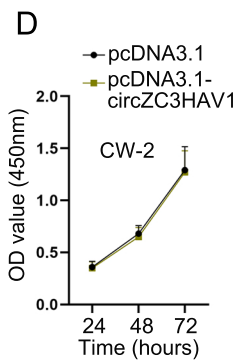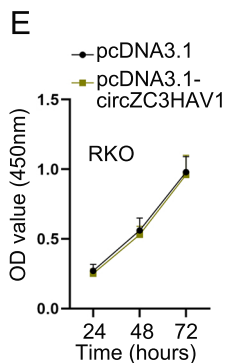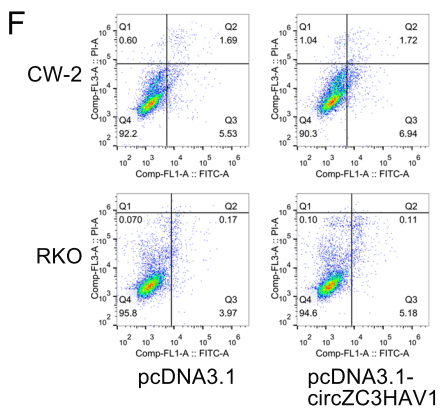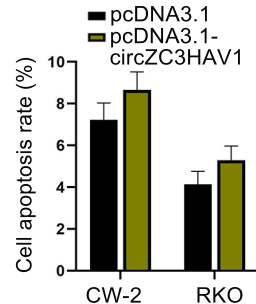

Supplement: f1 [file 7386946.f1.pdf]

A

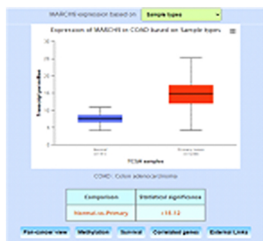

MARCH9

B

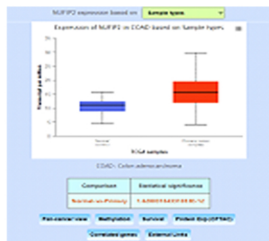

NUFIP2

C

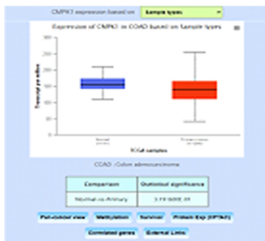

CMPK1

D

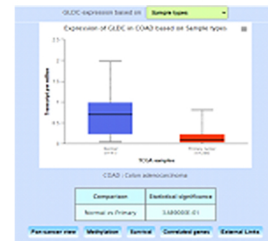

GLDC

E

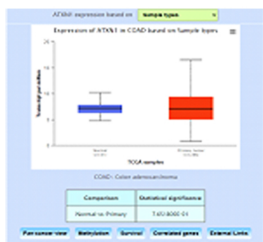

ATXN1

F

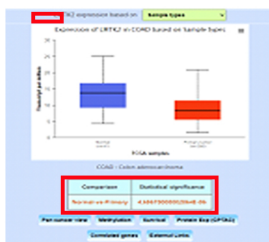

LMTK2

G

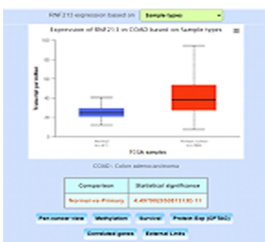

RNF213

H

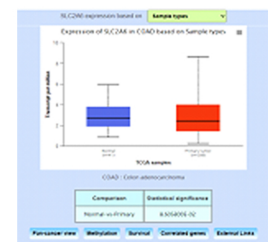

SLC2A6

I

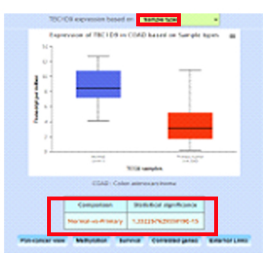

TBC1D9

J

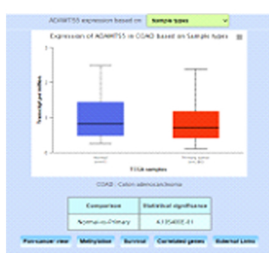

ADAMTS5

K

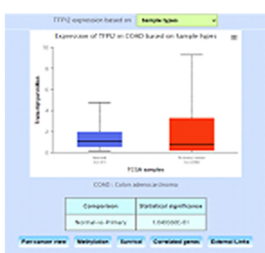

TFPI2

L

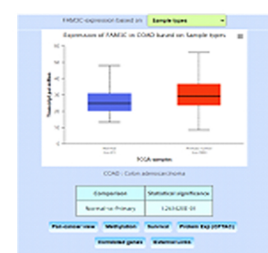

FAM3C

M

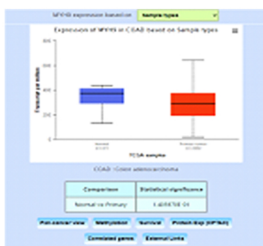

MYH9

N

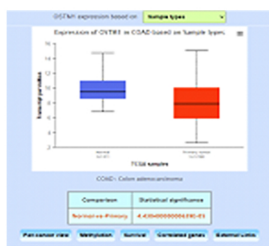

OSTM1

O

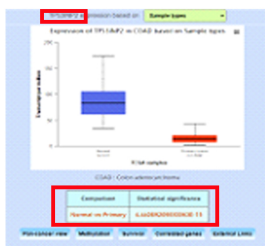

TP53INP2

Supplement: f2 [file 7386946.f2.pdf]
